# Supplementary material for: Single crystal α-Fe2O3 with exposed {104} facets for high performance gas sensor applications
Source: Royal Society of Chemistry journal article supplement (doi:10.1039/c2ra20797d), 2012-01-01
Supplement: c2ra20797d.pdf [file c2ra20797d.pdf]

**Electronic supplementary information:**

**Single Crystal  $\alpha$ -Fe<sub>2</sub>O<sub>3</sub> with Exposed {104} Facets for High Performance Gas Sensor Applications**

Xianghong Liu,<sup>1</sup> Jun Zhang,<sup>1</sup> Shihua,<sup>1</sup> Dongjiang Yang,<sup>2</sup> Porun Liu,<sup>2</sup> Haimin Zhang,<sup>2</sup> Wu Shurong Wang,<sup>1,\*</sup> Xiangdong Yao,<sup>3</sup> Guangshan Zhu,<sup>3</sup> and Huijun Zhao<sup>2,\*</sup>

<sup>1</sup> Department of Chemistry, TKL of Metal- and Molecule-Based Material Chemistry and Key Laboratory of Advanced Energy Materials Chemistry (MOE), Nankai University, Tianjin 300071, P. R. China

<sup>2</sup> Centre for Clean Environment and Energy, and Griffith School of Environment Gold Coast Campus, Griffith University, QLD 4222, Australia

<sup>3</sup> Queensland Micro and Nanotechnology Centre, Nathan campus, Griffith University, QLD 4111, Australia

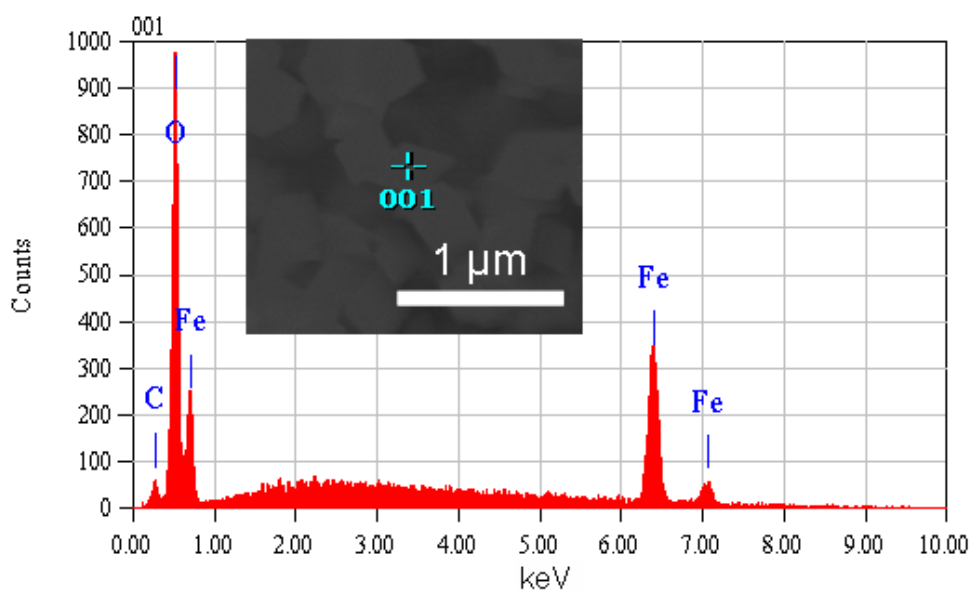

**Fig. S1.** EDS analysis of an individual rhombohedral  $\alpha$ -Fe<sub>2</sub>O<sub>3</sub> crystal.

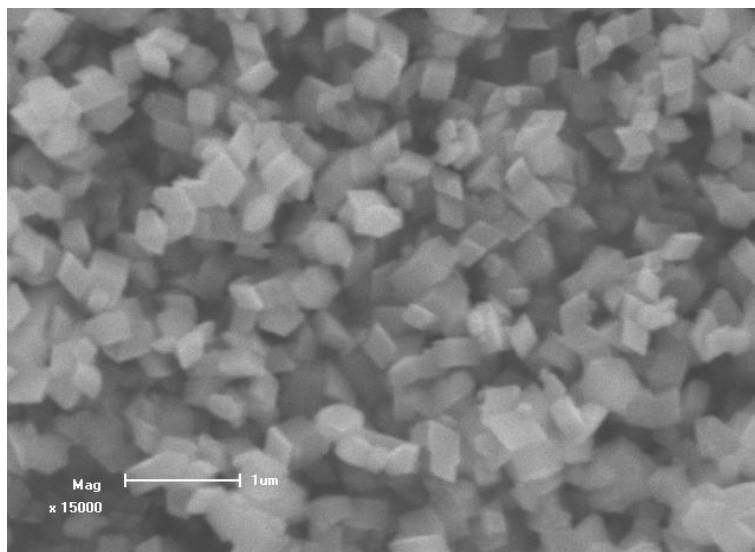

**Fig. S2.** SEM image of the  $\alpha$ -Fe<sub>2</sub>O<sub>3</sub> products prepared with 3.2 g formamide, showing that all the particles have a uniform rhombohedral morphology.

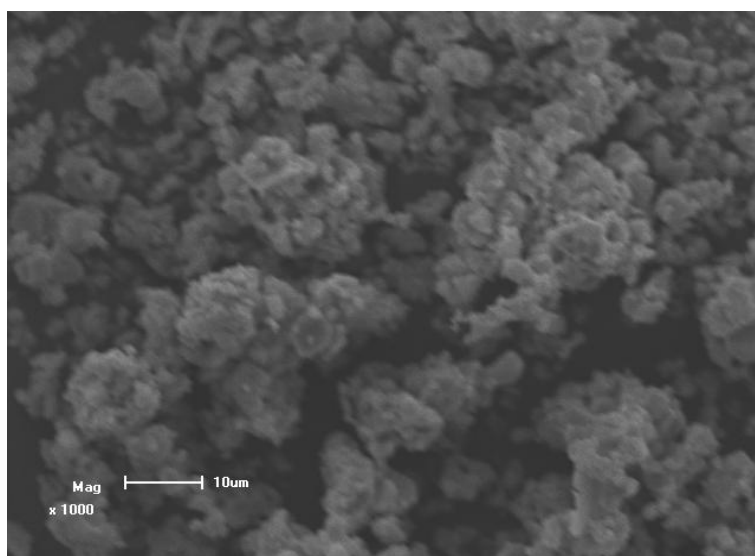

**Fig. S3.** SEM image of the commercial  $\alpha$ -Fe<sub>2</sub>O<sub>3</sub> powder.
